# Supplementary material for: Fabrication of an Original Transparent PVA/Gelatin Hydrogel: In Vitro Antimicrobial Activity against Skin Pathogens
Source: Hindawi journal article supplement (doi:10.1155/2019/7651810), 2019-03-14
Supplement: f1 [file 7651810.f1.pdf]

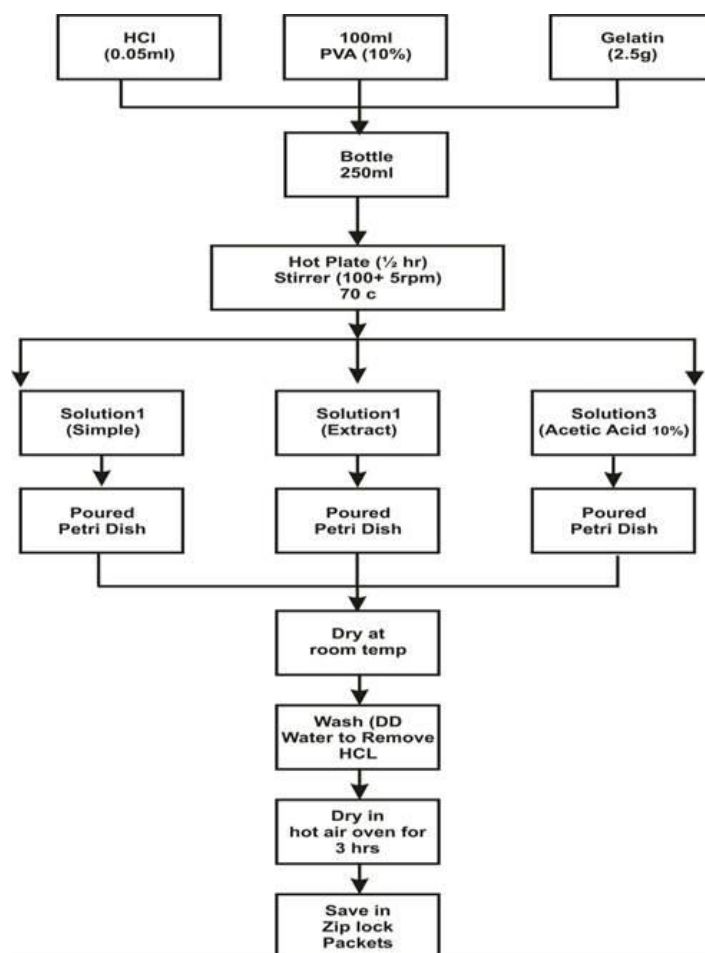

**Figure S1:** Flow chart of the methodology used for preparation of hydrogels

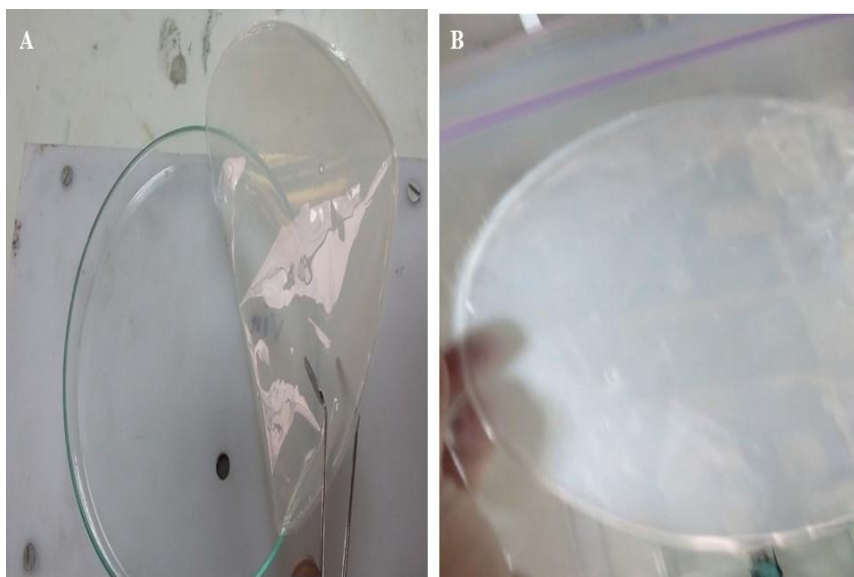

**Figure S2:** Preparation of hydrogels (**A**).The hydrogel is peeled off with the help of forceps from a 90 mm petri dish (**B**).The hydrogel is saved in a zip lock packet.
